# Supplementary material for: Self-templated synthesis of microporous CoO nanoparticles with highly enhanced performance for both photocatalysis and lithium-ion batteries
Source: Royal Society of Chemistry journal article supplement (doi:10.1039/c2ta00536k), 2012-11-12
Supplement: c2ta00536k.pdf [file c2ta00536k.pdf]

Supplementary Information for

# Self-templated synthesis of microporous CoO nanoparticles with highly enhanced performance for both photocatalysis and lithium-ion batteries

Xianfeng Zheng,<sup>a</sup> Guofang Shen,<sup>a</sup> Yu Li,<sup>\* a</sup> Hanning Duan,<sup>a</sup> Xiaoyu Yang,<sup>a</sup> Shaozhan Huang,<sup>a</sup> Hongen Wang,<sup>a</sup> Chao Wang,<sup>a</sup> Zhao Deng<sup>a</sup> and Bao-Lian Su<sup>\*a,b,c</sup>

<sup>a</sup> State Key Laboratory of Advanced Technology for Materials Synthesis and Processing, Wuhan University of Technology, Wuhan 430070, China

<sup>b</sup> Laboratory of Inorganic Materials Chemistry, University of Namur (FUNDP), 61 rue de Bruxelles, B5000, Namur, Belgium

<sup>c</sup> Department of Chemistry, University of Cambridge, Lensfield Road, CB2 1EW, Cambridge, United Kingdom

\* E-mail: bao-lian.su@fundp.ac.be & bls26@cam.ac.uk

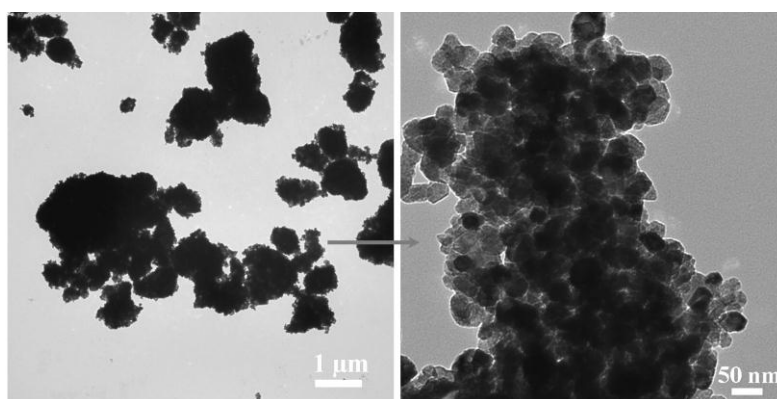

Figure. S1 TEM images of commercial CoO powder showing the agglomeration of numerous nanoparticles with particle diameter around 40-60 nm.

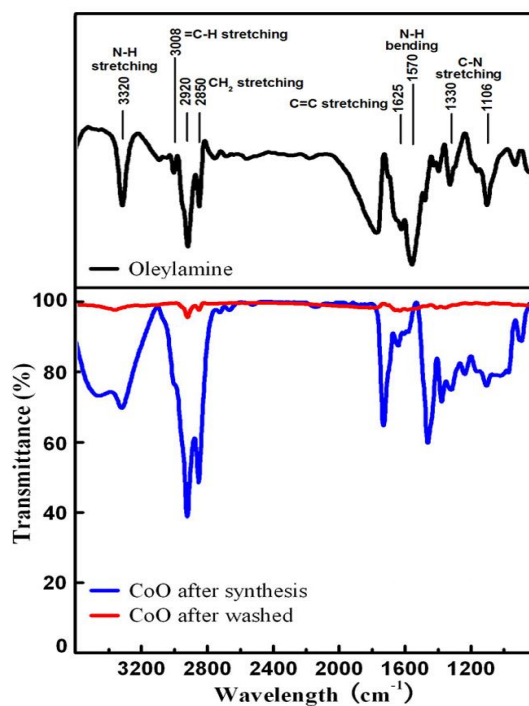

Figure. S2 FTIR spectra of the oleylamine (96%, Aldrich), the as-synthesized CoO nanoparticles and CoO nanoparticles after a washing process with ethanol.

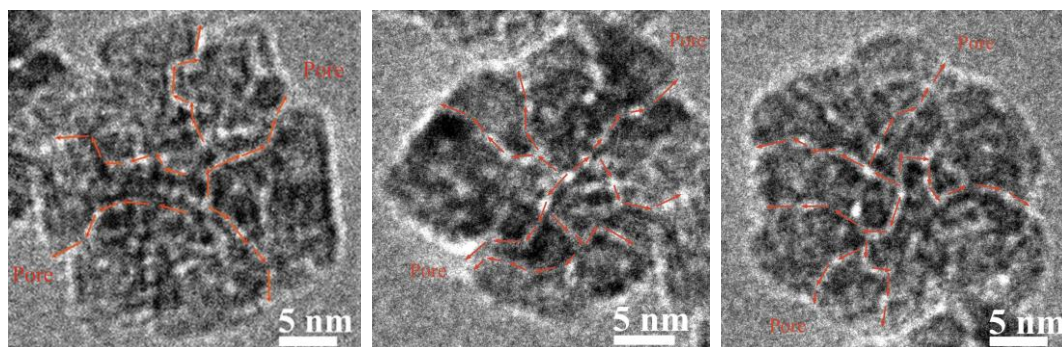

**Figure. S3** HRTEM images of three nanoparticles from sample 2 with the arrows showing the long and winding nanochannels.

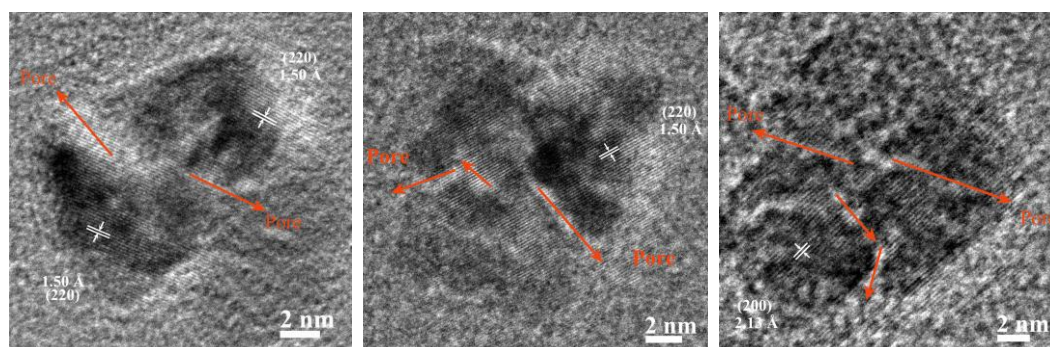

**Figure. S4** HRTEM images of three nanoparticles from sample 3 with the arrows showing the short and straight nanochannels.

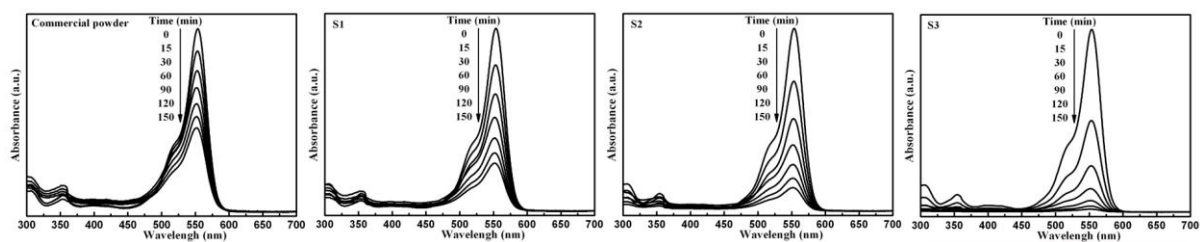

**Figure. S5** Time-dependent UV-vis absorption spectra for Rh B photodegradation with microporous CoO samples 1-3 and commercial powder.
